# Supplementary material for: Ecotoxicological assessment of biomass-derived furan platform chemicals using aquatic and terrestrial bioassays
Source: Royal Society of Chemistry journal article supplement (doi:10.1039/d3em00552f), 2024-01-01
Supplement: d3em00552f1.pdf [file d3em00552f1.pdf]

## Supporting Information

### Ecotoxicological assessment of biomass-derived furan platform chemicals using aquatic and terrestrial bioassays

**Stella Parmaki<sup>a</sup>, Marlen I. Vasquez<sup>a, b</sup>, Maria Patsalou<sup>a</sup>, Rafael F. A. Gomes<sup>c</sup>, Svilen P. Simeonov,<sup>c, d</sup> Carlos A. M. Afonso<sup>c</sup> and Michalis Koutinas<sup>a, \*</sup>**

<sup>a</sup> Department of Chemical Engineering, Cyprus University of Technology, 30 Archbishop Kyprianou Str., 3036, Limassol, Cyprus

<sup>b</sup> European University of Technology, 30 Archbishop Kyprianou Str., 3036, Limassol, Cyprus

<sup>c</sup> Research Institute for Medicines (iMed.Ulisboa), Faculty of Pharmacy, Universidade de Lisboa, Av. Prof. Gama Pinto, 1649-003, Lisbon, Portugal

<sup>d</sup> Institute of Organic Chemistry with Centre of Phytochemistry, Bulgarian Academy of Sciences, Acad. G. Bonchev str., bl. 9, 1113, Sofia, Bulgaria

\* Corresponding author.

*E-mail address:* [michail.koutinas@cut.ac.cy](mailto:michail.koutinas@cut.ac.cy) (M. Koutinas).

**Table S1.** Chemical structure, purity and synthesis (if applicable) of the compounds applied in the study.

| Chemical compound<br>(common name)                                                          | Chemical structure                                                                    | Details                                                                                  |
|---------------------------------------------------------------------------------------------|---------------------------------------------------------------------------------------|------------------------------------------------------------------------------------------|
| <b>furan-2-yl-methanol</b><br>(Furfuryl alcohol)                                            | 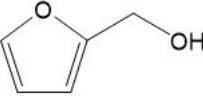   | Alfa Aeser, Ref. A10968,<br>distilled under vacuum <sup>a</sup>                          |
| <b>furan-2-carbaldehyde</b><br>(Furfural)                                                   |    | Alfa Aeser, Ref. A16167,<br>distilled under vacuum <sup>a</sup>                          |
| <b>furan-2-carboxylic acid</b><br>or <b>2-furoic acid</b><br>(FA)                           |    | Sigma Aldrich, Ref. F20505                                                               |
| <b>ethyl 2-furoate or</b><br><b>ethyl furan-2-carboxylate</b><br>(EFA)                      |    | Alfa Aeser, Ref. A13909                                                                  |
| <b>2,5-dimethylfuran</b><br>(DMF)                                                           |   | Sigma Aldrich, Ref. 177717                                                               |
| <b>furan-2,5-diylmethanol or</b><br><b>2,5-bis(hydroxymethyl)furan</b><br>(DHMF)            |  | Prepared and purified following<br>the method described by the<br>authors <sup>1,a</sup> |
| <b>5-hydroxymethyl furfural or</b><br><b>5-(hydroxymethyl)furan-2-carbaldehyde</b><br>(HMF) |  | Prepared and purified following<br>the method described by the<br>authors <sup>1,a</sup> |

**5-(hydroxymethyl)furan-2-carboxylic acid**  
(HMFA)

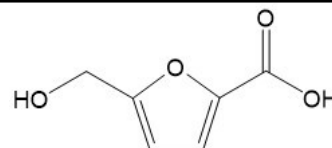

Prepared and purified following the method described by the authors<sup>1,a</sup>

**2,5-furandicarboxaldehyde or furan-2,5-dicarbaldehyde**  
(DFA)

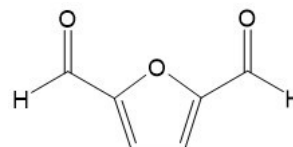

Prepared and purified following the method described by the authors<sup>2-4,a</sup>

**2,5-furandicarboxylic acid or furan-2,5-dicarboxylic acid**  
(FDCA)

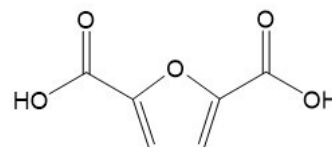

Prepared and purified following the method described by the authors<sup>2-4,a</sup>

**dimethyl furan-2,5-dicarboxylate**  
(DFDC)

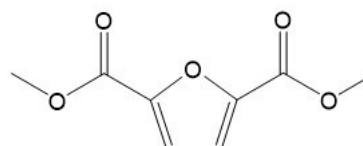

Prepared and purified following the method described by the authors for dimethyl ester<sup>5,a</sup>

**(5,5'-(oxybis(methylene))bis(furan-5,2-diyl))dimethanol**  
(OBMFA)

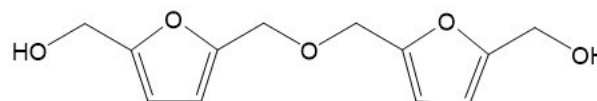

Prepared and purified following the method described by the authors for the monoreduction of aldehyde<sup>2,a</sup>

**5,5'-(oxybis(methylene))bis(furan-2-carbaldehyde)**  
(OBMF)

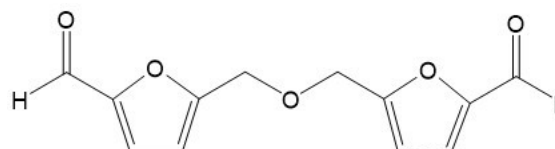

Prepared and purified following the method described by the authors<sup>2-6,a</sup>

**5,5'-(oxybis(methylene))bis(furan-2-carboxylic acid)**  
(OBCA)

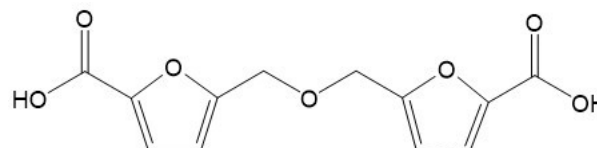

Prepared and purified following the method described by the authors for the monooxidation of aldehyde<sup>2,a</sup>

<sup>a</sup> Purity (> 97 %) determined by <sup>1</sup>H NMR (Bruker Fourier 300)

**Table S2:** Ecotoxicological effects of furan compounds in different organisms.

| Chemical name                 | Organism scientific name        | Organism common name | Concentration                          | Endpoint          | Exposure time                 | Reference                                  |
|-------------------------------|---------------------------------|----------------------|----------------------------------------|-------------------|-------------------------------|--------------------------------------------|
| <b>Freshwater algae</b>       |                                 |                      |                                        |                   |                               |                                            |
| Furfuryl alcohol              | <i>Chlorococcales</i>           | Green algae          | 1000 mg L <sup>-1</sup>                | EC <sub>10</sub>  | 1 d                           | ECOTOX <sup>7</sup>                        |
|                               |                                 |                      | > 1000 mg L <sup>-1</sup>              | EC <sub>50</sub>  | 1 d                           | ECOTOX <sup>7</sup>                        |
| Furfural                      | <i>Anabaena flosaquae</i>       | Blue-green algae     | 61 (39-93) mg L <sup>-1</sup>          | EC <sub>50</sub>  | 4 d                           | ECOTOX <sup>7</sup>                        |
|                               |                                 |                      | 12 mg L <sup>-1</sup>                  | NOEL              | 4 d                           | ECOTOX <sup>7</sup>                        |
|                               | <i>Chlorococcales</i>           | Green algae          | 84 mg L <sup>-1</sup>                  | EC <sub>10</sub>  | 1 d                           | ECOTOX <sup>7</sup>                        |
|                               |                                 |                      | 570 mg L <sup>-1</sup>                 | EC <sub>50</sub>  | 1 d                           | ECOTOX <sup>7</sup>                        |
|                               |                                 |                      | <i>Navicula pelliculosa</i>            | Diatom            | 32 (23-45) mg L <sup>-1</sup> | EC <sub>50</sub>                           |
|                               | <i>Raphidocelis subcapitata</i> | Green algae          | 5.8 mg L <sup>-1</sup>                 | NOEL              | 4 d                           | ECOTOX <sup>7</sup>                        |
|                               |                                 |                      | 19.9 mg L <sup>-1</sup>                | EC <sub>50</sub>  | 3 d                           | Zuriaga et al. <sup>8</sup>                |
| 43 (39-48) mg L <sup>-1</sup> |                                 |                      | EC <sub>50</sub>                       | 4 d               | ECOTOX <sup>7</sup>           |                                            |
| HMF                           | <i>Raphidocelis subcapitata</i> | Green algae          | 16.5 mg L <sup>-1</sup>                | NOEL              | 4 d                           | ECOTOX <sup>7</sup>                        |
|                               |                                 |                      | 110.2 (106.8-115.5) mg L <sup>-1</sup> | EC <sub>50</sub>  | 3 d                           | Muralidhara et al. <sup>9</sup>            |
| <b>Freshwater crustaceans</b> |                                 |                      |                                        |                   |                               |                                            |
| Furfuryl alcohol              | <i>Daphnia magna</i>            | Water flea           | 63 mg L <sup>-1</sup>                  | EC <sub>0</sub>   | 1 d                           | ECOTOX <sup>7</sup>                        |
|                               |                                 |                      | 110 ± 2 mg L <sup>-1</sup>             | EC <sub>50</sub>  | 1 d                           | Zuriaga et al. <sup>8</sup>                |
|                               |                                 |                      | 328 mg L <sup>-1</sup>                 | EC <sub>50</sub>  | 1 d                           | ECOTOX <sup>7</sup>                        |
|                               |                                 |                      | 4000 mg L <sup>-1</sup>                | EC <sub>100</sub> | 1 d                           | ECOTOX <sup>7</sup>                        |
|                               |                                 |                      | 31 mg L <sup>-1</sup>                  | LC <sub>0</sub>   | 1 d                           | ECOTOX <sup>7</sup>                        |
|                               |                                 |                      | 115 mg L <sup>-1</sup>                 | LC <sub>50</sub>  | 1 d                           | ECOTOX <sup>7</sup> , TOXNET <sup>10</sup> |
|                               |                                 |                      | 500 mg L <sup>-1</sup>                 | LC <sub>100</sub> | 1 d                           | ECOTOX <sup>7</sup>                        |
| Furfural                      | <i>Daphnia magna</i>            | Water flea           | 13 mg L <sup>-1</sup>                  | EC <sub>0</sub>   | 1 d                           | ECOTOX <sup>7</sup>                        |
|                               |                                 |                      | 29 mg L <sup>-1</sup>                  | EC <sub>50</sub>  | 1 d                           | ECOTOX <sup>7</sup>                        |
|                               |                                 |                      | 31 ± 1 mg L <sup>-1</sup>              | EC <sub>50</sub>  | 2 d                           | Zuriaga et al. <sup>8</sup>                |
|                               |                                 |                      | 51 mg L <sup>-1</sup>                  | EC <sub>100</sub> | 1 d                           | ECOTOX <sup>7</sup>                        |

|                        |                                      |            |                                      |                   |      |                                            |
|------------------------|--------------------------------------|------------|--------------------------------------|-------------------|------|--------------------------------------------|
|                        |                                      |            | 10 mg L <sup>-1</sup>                | EC <sub>0</sub>   | 1 d  | ECOTOX <sup>7</sup>                        |
|                        |                                      |            | 10 mg L <sup>-1</sup>                | EC <sub>0</sub>   | 2 d  | ECOTOX <sup>7</sup>                        |
|                        |                                      |            | 20.4 (16.4-25.2) mg L <sup>-1</sup>  | EC <sub>50</sub>  | 2 d  | ECOTOX <sup>7</sup>                        |
|                        |                                      |            | 56 mg L <sup>-1</sup>                | EC <sub>100</sub> | 1 d  | ECOTOX <sup>7</sup>                        |
|                        |                                      |            | 56 mg L <sup>-1</sup>                | EC <sub>100</sub> | 2 d  | ECOTOX <sup>7</sup>                        |
|                        |                                      |            | 25 mg L <sup>-1</sup>                | LC <sub>0</sub>   | 1 d  | ECOTOX <sup>7</sup>                        |
|                        |                                      |            | 36 mg L <sup>-1</sup>                | LC <sub>50</sub>  | 1 d  | ECOTOX <sup>7</sup> , TOXNET <sup>10</sup> |
|                        |                                      |            | 52 mg L <sup>-1</sup>                | LC <sub>100</sub> | 1 d  | ECOTOX <sup>7</sup>                        |
|                        |                                      |            | 39 (35-43) mg L <sup>-1</sup>        | LC <sub>50</sub>  | 1 d  | ECOTOX <sup>7</sup>                        |
|                        |                                      |            | 13 (11-15) mg L <sup>-1</sup>        | LC <sub>50</sub>  | 3 d  | ECOTOX <sup>7</sup> , TOXNET <sup>10</sup> |
|                        |                                      |            | 18 mg L <sup>-1</sup>                | LOEC              | 2 d  | ECOTOX <sup>7</sup>                        |
|                        |                                      |            | 3.7 mg L <sup>-1</sup>               | LOEC              | 21 d | ECOTOX <sup>7</sup>                        |
|                        |                                      |            | 3.7 mg L <sup>-1</sup>               | LOEC              | 21 d | ECOTOX <sup>7</sup>                        |
|                        |                                      |            | 10 mg L <sup>-1</sup>                | NOEC              | 2 d  | ECOTOX <sup>7</sup>                        |
|                        |                                      |            | 1.9 mg L <sup>-1</sup>               | NOEC              | 21 d | ECOTOX <sup>7</sup>                        |
|                        |                                      |            | 1.9 mg L <sup>-1</sup>               | NOEC              | 21 d | ECOTOX <sup>7</sup>                        |
|                        |                                      |            | 5.7 mg L <sup>-1</sup>               | NOEL              | 2 d  | ECOTOX <sup>7</sup>                        |
|                        | <i>Gammarus pseudolimnaeus</i>       | Scud       | 11.89 (9.18-15.4) mg L <sup>-1</sup> | LC <sub>50</sub>  | 4 d  | ECOTOX <sup>7</sup>                        |
| HMF                    | <i>Daphnia magna</i>                 | Water flea | > 500 mg L <sup>-1</sup>             | EC <sub>50</sub>  | 1 d  | Muralidhara et al. <sup>9</sup>            |
|                        |                                      |            | 36.5 (30.0-45.1) mg L <sup>-1</sup>  | EC <sub>50</sub>  | 2 d  | Muralidhara et al. <sup>9</sup>            |
|                        |                                      |            | 55.3 (50.3-60.9)                     | EC <sub>50</sub>  | 2 d  | Swart et al. <sup>11</sup>                 |
|                        |                                      |            | 62 (53-78) mg L <sup>-1</sup>        | LC <sub>50</sub>  | 1 d  | ECOTOX <sup>7</sup> , TOXNET <sup>10</sup> |
|                        |                                      |            | 34 (27-43) mg L <sup>-1</sup>        | LC <sub>50</sub>  | 3 d  | ECOTOX <sup>7</sup> , TOXNET <sup>10</sup> |
| <b>Freshwater fish</b> |                                      |            |                                      |                   |      |                                            |
| Furfuryl alcohol       | <i>Leuciscus idus ssp. melanotus</i> | Carp       | 113 mg L <sup>-1</sup>               | LC <sub>0</sub>   | 2 d  | ECOTOX <sup>7</sup>                        |
|                        |                                      |            | 226 mg L <sup>-1</sup>               | LC <sub>0</sub>   | 2 d  | ECOTOX <sup>7</sup>                        |
|                        |                                      |            | 701 mg L <sup>-1</sup>               | LC <sub>50</sub>  | 2 d  | ECOTOX <sup>7</sup>                        |
|                        |                                      |            | 1356 mg L <sup>-1</sup>              | LC <sub>50</sub>  | 2 d  | ECOTOX <sup>7</sup>                        |
|                        |                                      |            | 1495 mg L <sup>-1</sup>              | LC <sub>100</sub> | 2 d  | ECOTOX <sup>7</sup>                        |

|          |                                      |                      |                                        |                   |      |                                            |
|----------|--------------------------------------|----------------------|----------------------------------------|-------------------|------|--------------------------------------------|
|          |                                      |                      | 1700 mg L <sup>-1</sup>                | LC <sub>100</sub> | 2 d  | ECOTOX <sup>7</sup>                        |
|          | <i>Pimephales promelas</i>           | Fathead minnow       | 7240 mg L <sup>-1</sup>                | EC <sub>50</sub>  | 2 h  | ECOTOX <sup>7</sup>                        |
| Furfural | <i>Cyprinodon variegatus</i>         | Sheepshead minnow    | 14 (12-15) mg L <sup>-1</sup>          | LC <sub>50</sub>  | 4 d  | ECOTOX <sup>7</sup>                        |
|          |                                      |                      | 4.2 mg L <sup>-1</sup>                 | NOEL              | 4 d  | ECOTOX <sup>7</sup>                        |
|          | <i>Gambusia affinis</i>              | Western mosquitofish | 44 mg L <sup>-1</sup>                  | LC <sub>50</sub>  | 1 d  | ECOTOX <sup>7</sup> , TOXNET <sup>10</sup> |
|          |                                      |                      | 24 mg L <sup>-1</sup>                  | LC <sub>50</sub>  | 2 d  | ECOTOX <sup>7</sup> , TOXNET <sup>10</sup> |
|          |                                      |                      | 24 mg L <sup>-1</sup>                  | LC <sub>50</sub>  | 4 d  | ECOTOX <sup>7</sup> , TOXNET <sup>10</sup> |
|          | <i>Lepomis macrochirus</i>           | Bluegill             | 5.8 mg L <sup>-1</sup>                 | EC <sub>50</sub>  | 4 d  | Zuriaga et al. <sup>8</sup>                |
|          |                                      |                      | 32 mg L <sup>-1</sup>                  | LC <sub>50</sub>  | 1 d  | ECOTOX <sup>7</sup> , TOXNET <sup>10</sup> |
|          |                                      |                      | 16 mg L <sup>-1</sup>                  | LC <sub>50</sub>  | 2 d  | ECOTOX <sup>7</sup> , TOXNET <sup>10</sup> |
|          |                                      |                      | 5.8 (3.2-9) mg L <sup>-1</sup>         | LC <sub>50</sub>  | 4 d  | ECOTOX <sup>7</sup>                        |
|          |                                      |                      | 3.2 mg L <sup>-1</sup>                 | NOEL              | 4 d  | ECOTOX <sup>7</sup>                        |
|          | <i>Leuciscus idus ssp. melanotus</i> | Carp                 | 12 mg L <sup>-1</sup>                  | LC <sub>0</sub>   | 2 d  | ECOTOX <sup>7</sup>                        |
|          |                                      |                      | 29 mg L <sup>-1</sup>                  | LC <sub>50</sub>  | 2 d  | ECOTOX <sup>7</sup>                        |
|          |                                      |                      | 46 mg L <sup>-1</sup>                  | LC <sub>100</sub> | 2 d  | ECOTOX <sup>7</sup>                        |
|          | <i>Oncorhynchus mykiss</i>           | Rainbow trout        | 3.62 mg L <sup>-1</sup>                | EC <sub>50</sub>  | 4 d  | Zuriaga et al. <sup>8</sup>                |
|          |                                      |                      | 3.06 (2.14-4.53) mg L <sup>-1</sup>    | LC <sub>50</sub>  | 4 d  | ECOTOX <sup>7</sup>                        |
|          |                                      |                      | 0.56 mg L <sup>-1</sup>                | NOEL              | 4 d  | ECOTOX <sup>7</sup>                        |
|          | <i>Pimephales promelas</i>           | Fathead minnow       | 726 mg L <sup>-1</sup>                 | EC <sub>50</sub>  | 2 h  | ECOTOX <sup>7</sup>                        |
|          |                                      |                      | 20.6 mg L <sup>-1</sup>                | EC <sub>50</sub>  | 4 d  | Zuriaga et al. <sup>8</sup>                |
|          |                                      |                      | > 50 mg L <sup>-1</sup>                | LC <sub>50</sub>  | 1 h  | ECOTOX <sup>7</sup> , TOXNET <sup>10</sup> |
|          |                                      |                      | 48 mg L <sup>-1</sup>                  | LC <sub>50</sub>  | 1 d  | ECOTOX <sup>7</sup> , TOXNET <sup>10</sup> |
|          |                                      |                      | > 50 mg L <sup>-1</sup>                | LC <sub>50</sub>  | 1 d  | ECOTOX <sup>7</sup> , TOXNET <sup>10</sup> |
|          |                                      |                      | 37 mg L <sup>-1</sup>                  | LC <sub>50</sub>  | 2 d  | ECOTOX <sup>7</sup> , TOXNET <sup>10</sup> |
|          |                                      |                      | 32 mg L <sup>-1</sup>                  | LC <sub>50</sub>  | 3 d  | ECOTOX <sup>7</sup> , TOXNET <sup>10</sup> |
|          |                                      |                      | 33 mg L <sup>-1</sup>                  | LC <sub>50</sub>  | 3 d  | ECOTOX <sup>7</sup> , TOXNET <sup>10</sup> |
|          |                                      |                      | 16.1 (13.4-19.3) mg L <sup>-1</sup>    | LC <sub>50</sub>  | 4 d  | ECOTOX <sup>7</sup>                        |
|          |                                      |                      | 21.02 (16.79-26.35) mg L <sup>-1</sup> | LC <sub>50</sub>  | 4 d  | ECOTOX <sup>7</sup>                        |
|          |                                      |                      | 32 mg L <sup>-1</sup>                  | LC <sub>50</sub>  | 4 d  | ECOTOX <sup>7</sup> , TOXNET <sup>10</sup> |
|          |                                      |                      | 0.095 mg L <sup>-1</sup>               | LOEC              | 32 d | ECOTOX <sup>7</sup>                        |

|                         |                             |                             |                                   |                  |        |                                            |
|-------------------------|-----------------------------|-----------------------------|-----------------------------------|------------------|--------|--------------------------------------------|
|                         |                             |                             | 0.426 mg L <sup>-1</sup>          | LOEC             | 33 d   | ECOTOX <sup>7</sup>                        |
|                         |                             |                             | 0.915 mg L <sup>-1</sup>          | LOEC             | 33 d   | ECOTOX <sup>7</sup>                        |
|                         |                             |                             | 0.915 mg L <sup>-1</sup>          | LOEC             | 33 d   | ECOTOX <sup>7</sup>                        |
|                         |                             |                             | 0.624 mg L <sup>-1</sup>          | MATC             | 33 d   | ECOTOX <sup>7</sup>                        |
|                         |                             |                             | < 0.426 mg L <sup>-1</sup>        | MATC             | 33 d   | ECOTOX <sup>7</sup>                        |
|                         |                             |                             | 0.624 mg L <sup>-1</sup>          | MATC             | 33 d   | ECOTOX <sup>7</sup>                        |
|                         |                             |                             | 0.038 mg L <sup>-1</sup>          | NOEC             | 32 d   | ECOTOX <sup>7</sup>                        |
|                         |                             |                             | 0.426 mg L <sup>-1</sup>          | NOEC             | 33 d   | ECOTOX <sup>7</sup>                        |
|                         | <i>Poecilia reticulata</i>  | Guppy                       | 10.6 mg L <sup>-1</sup>           | EC <sub>50</sub> | 14 d   | Zuriaga et al. <sup>8</sup>                |
|                         | <i>Rasbora heteromorpha</i> | Harlequinfish, red rasbora  | 31 mg L <sup>-1</sup>             | LC <sub>50</sub> | 1 d    | ECOTOX <sup>7</sup> , TOXNET <sup>10</sup> |
|                         |                             |                             | 23 mg L <sup>-1</sup>             | LC <sub>50</sub> | 2 d    | ECOTOX <sup>7</sup> , TOXNET <sup>10</sup> |
| DMF                     | <i>Pimephales promelas</i>  | Fathead minnow              | 71.1 (62-81.6) mg L <sup>-1</sup> | LC <sub>50</sub> | 4 d    | ECOTOX <sup>7</sup>                        |
| <b>Freshwater worms</b> |                             |                             |                                   |                  |        |                                            |
| Furfural                | <i>Meloidogyne javanica</i> | Javanese root-knot nematode | 13.0 uL L <sup>-1</sup>           | EC <sub>50</sub> | 2 d    | ECOTOX <sup>7</sup>                        |
|                         |                             |                             | 39.4 uL L <sup>-1</sup>           | EC <sub>50</sub> | 5 d    | ECOTOX <sup>7</sup>                        |
| <b>Marine algae</b>     |                             |                             |                                   |                  |        |                                            |
| Furfural                | <i>Skeletonema costatum</i> | Diatom                      | 24 (17-33) mg L <sup>-1</sup>     | EC <sub>50</sub> | 4 d    | ECOTOX <sup>7</sup>                        |
|                         |                             |                             | 13 mg L <sup>-1</sup>             | NOEL             | 4 d    | ECOTOX <sup>7</sup>                        |
| <b>Marine bacteria</b>  |                             |                             |                                   |                  |        |                                            |
| Furfuryl alcohol        | <i>Aliivibrio fischeri</i>  |                             | 167 ± 57.5 mg L <sup>-1</sup>     | EC <sub>50</sub> | 5 min  | Ventura et al. <sup>4</sup>                |
|                         |                             |                             | 131 ± 38.4 mg L <sup>-1</sup>     | EC <sub>50</sub> | 15 min | Ventura et al. <sup>4</sup>                |
|                         |                             |                             | 101 ± 25.65 mg L <sup>-1</sup>    | EC <sub>50</sub> | 30 min | Ventura et al. <sup>4</sup>                |
|                         |                             |                             | 116 ± 9 mg L <sup>-1</sup>        | EC <sub>50</sub> | 30 min | Zuriaga et al. <sup>8</sup>                |
| Furfural                | <i>Aliivibrio fischeri</i>  |                             | 339 ± 84.5 mg L <sup>-1</sup>     | EC <sub>50</sub> | 5 min  | Ventura et al. <sup>4</sup>                |
|                         |                             |                             | 255 ± 66.5 mg L <sup>-1</sup>     | EC <sub>50</sub> | 15 min | Ventura et al. <sup>4</sup>                |
|                         |                             |                             | 188 ± 46.5 mg L <sup>-1</sup>     | EC <sub>50</sub> | 30 min | Ventura et al. <sup>4</sup>                |
|                         |                             |                             | 454 ± 5 mg L <sup>-1</sup>        | EC <sub>50</sub> | 30 min | Zuriaga et al. <sup>8</sup>                |
| FA                      | <i>Aliivibrio fischeri</i>  |                             | 15.6 ± 0.85 mg L <sup>-1</sup>    | EC <sub>50</sub> | 5 min  | Ventura et al. <sup>4</sup>                |
|                         |                             |                             | 15.4 ± 1.05 mg L <sup>-1</sup>    | EC <sub>50</sub> | 15 min | Ventura et al. <sup>4</sup>                |

|                           |                               |                               |                                       |                  |                     |                             |
|---------------------------|-------------------------------|-------------------------------|---------------------------------------|------------------|---------------------|-----------------------------|
|                           |                               |                               | 14.9 ± 0.7 mg L <sup>-1</sup>         | EC <sub>50</sub> | 30min               | Ventura et al. <sup>4</sup> |
| DMF                       | <i>Aliivibrio fischeri</i>    |                               | 33.5 ± 14.65 mg L <sup>-1</sup>       | EC <sub>50</sub> | 5 min               | Ventura et al. <sup>4</sup> |
|                           |                               |                               | 24.3 ± 9.5 mg L <sup>-1</sup>         | EC <sub>50</sub> | 15 min              | Ventura et al. <sup>4</sup> |
| DHMF                      | <i>Aliivibrio fischeri</i>    |                               | 23.4 ± 6.8 mg L <sup>-1</sup>         | EC <sub>50</sub> | 30 min              | Ventura et al. <sup>4</sup> |
|                           |                               |                               | 314 ± 53.5 mg L <sup>-1</sup>         | EC <sub>50</sub> | 5 min               | Ventura et al. <sup>4</sup> |
|                           |                               |                               | 306 ± 39.5 mg L <sup>-1</sup>         | EC <sub>50</sub> | 15 min              | Ventura et al. <sup>4</sup> |
| HMF                       | <i>Aliivibrio fischeri</i>    |                               | 290 ± 43 mg L <sup>-1</sup>           | EC <sub>50</sub> | 30 min              | Ventura et al. <sup>4</sup> |
|                           |                               |                               | 407 ± 73 mg L <sup>-1</sup>           | EC <sub>50</sub> | 5 min               | Ventura et al. <sup>4</sup> |
|                           |                               |                               | 385 ± 63.5 mg L <sup>-1</sup>         | EC <sub>50</sub> | 15 min              | Ventura et al. <sup>4</sup> |
| DFA                       | <i>Aliivibrio fischeri</i>    |                               | 389 ± 103.5 mg L <sup>-1</sup>        | EC <sub>50</sub> | 30 min              | Ventura et al. <sup>4</sup> |
|                           |                               |                               | 39.2 ± 12.5 mg L <sup>-1</sup>        | EC <sub>50</sub> | 5 min               | Ventura et al. <sup>4</sup> |
|                           |                               |                               | 21.3 ± 6.25 mg L <sup>-1</sup>        | EC <sub>50</sub> | 15 min              | Ventura et al. <sup>4</sup> |
| FDCA                      | <i>Aliivibrio fischeri</i>    |                               | 22.8 ± 10.3 mg L <sup>-1</sup>        | EC <sub>50</sub> | 30 min              | Ventura et al. <sup>4</sup> |
|                           |                               |                               | 10.4 ± 1.1 mg L <sup>-1</sup>         | EC <sub>50</sub> | 5 min               | Ventura et al. <sup>4</sup> |
|                           |                               |                               | 9.66 ± 1.14 mg L <sup>-1</sup>        | EC <sub>50</sub> | 15 min              | Ventura et al. <sup>4</sup> |
|                           |                               |                               | 9.57 ± 1.25 mg L <sup>-1</sup>        | EC <sub>50</sub> | 30 min              | Ventura et al. <sup>4</sup> |
| <b>Marine crustaceans</b> |                               |                               |                                       |                  |                     |                             |
| Furfural                  | <i>Americamysis bahia</i>     | Opossum shrimp                | 8.76 (6.84-11.2) mg L <sup>-1</sup>   | LC <sub>50</sub> | 4 d                 | ECOTOX <sup>7</sup>         |
|                           |                               |                               | 10.57 (7.94-14.07) mg L <sup>-1</sup> | LC <sub>50</sub> | 4 d                 | ECOTOX <sup>7</sup>         |
|                           |                               |                               | 14.1 mg L <sup>-1</sup>               | LC <sub>50</sub> | 4 d                 | ECOTOX <sup>7</sup>         |
|                           |                               | 15 (12-19) mg L <sup>-1</sup> | LC <sub>50</sub>                      | 4 d              | ECOTOX <sup>7</sup> |                             |
|                           |                               | 3.8 mg L <sup>-1</sup>        | NOEL                                  | 4 d              | ECOTOX <sup>7</sup> |                             |
|                           |                               | 10 mg L <sup>-1</sup>         | LC <sub>0</sub>                       | 1 d              | ECOTOX <sup>7</sup> |                             |
|                           | <i>Chaetogammarus marinus</i> | Amphipod                      | 18 mg L <sup>-1</sup>                 | LC <sub>0</sub>  | 1 d                 | ECOTOX <sup>7</sup>         |
|                           |                               |                               | 10 mg L <sup>-1</sup>                 | LC <sub>0</sub>  | 2 d                 | ECOTOX <sup>7</sup>         |
|                           |                               |                               | 10 mg L <sup>-1</sup>                 | LC <sub>0</sub>  | 3 d                 | ECOTOX <sup>7</sup>         |
|                           |                               |                               | 10 mg L <sup>-1</sup>                 | LC <sub>0</sub>  | 4 d                 | ECOTOX <sup>7</sup>         |
|                           |                               |                               | 40 (32-50) mg L <sup>-1</sup>         | LC <sub>50</sub> | 1 d                 | ECOTOX <sup>7</sup>         |
|                           |                               |                               | 51 (42-61) mg L <sup>-1</sup>         | LC <sub>50</sub> | 1 d                 | ECOTOX <sup>7</sup>         |
|                           |                               |                               |                                       |                  |                     |                             |



|                        |                              |                             |                               |                   |     |                     |
|------------------------|------------------------------|-----------------------------|-------------------------------|-------------------|-----|---------------------|
|                        |                              |                             | 24 (20-29) mg L <sup>-1</sup> | LC <sub>50</sub>  | 2 d | ECOTOX <sup>7</sup> |
|                        |                              |                             | 30 (24-38) mg L <sup>-1</sup> | LC <sub>50</sub>  | 2 d | ECOTOX <sup>7</sup> |
|                        |                              |                             | 19 (16-23) mg L <sup>-1</sup> | LC <sub>50</sub>  | 3 d | ECOTOX <sup>7</sup> |
|                        |                              |                             | 23 (18-28) mg L <sup>-1</sup> | LC <sub>50</sub>  | 3 d | ECOTOX <sup>7</sup> |
|                        |                              |                             | 15 (13-19) mg L <sup>-1</sup> | LC <sub>50</sub>  | 4 d | ECOTOX <sup>7</sup> |
|                        |                              |                             | 21 (17-27) mg L <sup>-1</sup> | LC <sub>50</sub>  | 4 d | ECOTOX <sup>7</sup> |
|                        |                              |                             | > 56 mg L <sup>-1</sup>       | LC <sub>100</sub> | 1 d | ECOTOX <sup>7</sup> |
|                        |                              |                             | 56 mg L <sup>-1</sup>         | LC <sub>100</sub> | 2 d | ECOTOX <sup>7</sup> |
|                        |                              |                             | 32 mg L <sup>-1</sup>         | LC <sub>100</sub> | 3 d | ECOTOX <sup>7</sup> |
|                        |                              |                             | 56 mg L <sup>-1</sup>         | LC <sub>100</sub> | 3 d | ECOTOX <sup>7</sup> |
|                        |                              |                             | 32 mg L <sup>-1</sup>         | LC <sub>100</sub> | 4 d | ECOTOX <sup>7</sup> |
|                        |                              |                             | 5.6 mg L <sup>-1</sup>        | LOEC              | 4 d | ECOTOX <sup>7</sup> |
|                        |                              |                             | 10 mg L <sup>-1</sup>         | LOEC              | 4 d | ECOTOX <sup>7</sup> |
|                        |                              |                             | < 5.6 mg L <sup>-1</sup>      | NOEC              | 4 d | ECOTOX <sup>7</sup> |
|                        |                              |                             | 5.6 mg L <sup>-1</sup>        | NOEC              | 4 d | ECOTOX <sup>7</sup> |
| <b>Marine molluscs</b> |                              |                             |                               |                   |     |                     |
| Furfural               | <i>Crassostrea virginica</i> | American or virginia oyster | 18 (14-22) mg L <sup>-1</sup> | EC <sub>50</sub>  | 4 d | ECOTOX <sup>7</sup> |
|                        |                              |                             | 5 mg L <sup>-1</sup>          | NOEL              | 4 d | ECOTOX <sup>7</sup> |

## References

- 1 R. F. A. Gomes, Y. N. Mitrev, S. P. Simeonov and C. A. M. Afonso, *ChemSusChem*, 2018, **11**, 1612–1616.
- 2 C. Martins, D. O. Hartmann, A. Varela, J. A. S. Coelho, P. Lamosa, C. A. M. Afonso and C. Silva Pereira, *Microbial Biotechnolog*, 2020, **13**, 1983–1996.
- 3 R. F. M. Frade, J. A. S. Coelho, S. P. Simeonov and C. A. M. Afonso, *Toxicol Res (Camb)*, 2014, **3**, 311–314.
- 4 S. P. M. Ventura, P. Morais, J. A. S. Coelho, T. Sintra, J. A. P. Coutinho and C. A. M. Afonso, *Green Chemistry*, 2016, **18**, 4733–4742.

- 5 J. M. J. M. Ravasco, C. M. Monteiro, F. Siopa, A. F. Trindade, J. Oble, G. Poli, S. P. Simeonov and C. A. M. Afonso, *ChemSusChem*, 2019, **12**, 4629–4635.
- 6 N. Stanev, J. C. M. Bordado, C. A. M. Afonso and S. P. Simeonov, *ChemCatChem*, 2018, **10**, 5406–5409.
- 7 United States Environmental Protection Agency (US EPA), *ECOTOX Knowledgebase* <http://www.epa.gov/ecotox/>
- 8 E. Zuriaga, B. Giner, M. P. Ribate, C. B. García and L. Lomba, *Environ Toxicol Chem*, 2018, **37**, 1014–1023.
- 9 A. Muralidhara, A. Bado-Nilles, G. Marlair, V. Engelen, C. Len and P. Pandard, *Biofuels, Bioproducts and Biorefining*, 2019, **13**, 464–470.
- 10 National Institutes of Health (NIH), *TOXNET database* <https://www.nlm.nih.gov/toxnet/index.html>
- 11 E. Swart, T. E. Boer, G. Chen, R. Vooijs, C. A. M. Gestel, N. M. Straalen and D. Roelofs, *Environmental Pollution*, 2019, **252**, 399–408.
